# Supplementary material
Source: publisher figshare collection journal article supplement (https://tandf.figshare.com/articles/dataset/_/4797289)
Supplement: Supplementary file 1 [file 1]

Initial Partition with prior maximal distance P=1.92e-03

Distance JC69 Jukes-Cantor MinSlope=1.500000

Download (left click and save) or see below the tree file corresponding to this partition: click [here](#)

**Group[ 1 ] n: 1** ;id: gij12382925|gb|AF332791.1|\_Calanoides\_acutus\_cytochrome\_oxidase\_subunit\_I\_(COI)\_gene\_partial\_cds\_mitochondrial\_gene\_for\_mitochondrial\_product

**Group[ 2 ] n: 1** ;id:

gij12382923|gb|AF332790.1|\_Calanoides\_macrocarinatus\_cytochrome\_oxidase\_subunit\_I\_(COI)\_gene\_partial\_cds\_mitochondrial\_gene\_for\_mitochondrial\_product

**Group[ 3 ] n: 18** ;id: gij529949953|gb|KC287433.1|\_Calanoides\_carinatus\_voucher\_KS63.5\_cytochrome\_c\_oxidase\_subunit\_I\_(COI)\_gene\_partial\_cds\_mitochondrial

gij529949955|gb|KC287434.1|\_Calanoides\_carinatus\_voucher\_KS63.6\_cytochrome\_c\_oxidase\_subunit\_I\_(COI)\_gene\_partial\_cds\_mitochondrial

gij529949959|gb|KC287436.1|\_Calanoides\_carinatus\_voucher\_KS63.4\_cytochrome\_c\_oxidase\_subunit\_I\_(COI)\_gene\_partial\_cds\_mitochondrial

gij529949957|gb|KC287435.1|\_Calanoides\_carinatus\_voucher\_JS61.1\_cytochrome\_c\_oxidase\_subunit\_I\_(COI)\_gene\_partial\_cds\_mitochondrial

gij529950015|gb|KC287464.1|\_Calanoides\_carinatus\_voucher\_CaLSJG1.3\_cytochrome\_c\_oxidase\_subunit\_I\_(COI)\_gene\_partial\_cds\_mitochondrial

gij529950017|gb|KC287465.1|\_Calanoides\_carinatus\_voucher\_CaLSJG1.6\_cytochrome\_c\_oxidase\_subunit\_I\_(COI)\_gene\_partial\_cds\_mitochondrial

gij529950019|gb|KC287466.1|\_Calanoides\_carinatus\_voucher\_CaLSJG1.7\_cytochrome\_c\_oxidase\_subunit\_I\_(COI)\_gene\_partial\_cds\_mitochondrial

gij529950013|gb|KC287463.1|\_Calanoides\_carinatus\_voucher\_CaLSJG1.2\_cytochrome\_c\_oxidase\_subunit\_I\_(COI)\_gene\_partial\_cds\_mitochondrial

gij529950011|gb|KC287462.1|\_Calanoides\_carinatus\_voucher\_CaLSJG1.1\_cytochrome\_c\_oxidase\_subunit\_I\_(COI)\_gene\_partial\_cds\_mitochondrial

gij529950021|gb|KC287467.1|\_Calanoides\_carinatus\_voucher\_CaLSJG1.8\_cytochrome\_c\_oxidase\_subunit\_I\_(COI)\_gene\_partial\_cds\_mitochondrial

gij529949987|gb|KC287450.1|\_Calanoides\_carinatus\_voucher\_JS61.2\_cytochrome\_c\_oxidase\_subunit\_I\_(COI)\_gene\_partial\_cds\_mitochondrial

gij529949985|gb|KC287449.1|\_Calanoides\_carinatus\_voucher\_JS60.4\_cytochrome\_c\_oxidase\_subunit\_I\_(COI)\_gene\_partial\_cds\_mitochondrial

gij529949989|gb|KC287451.1|\_Calanoides\_carinatus\_voucher\_JS61.3\_cytochrome\_c\_oxidase\_subunit\_I\_(COI)\_gene\_partial\_cds\_mitochondrial

gij529949991|gb|KC287452.1|\_Calanoides\_carinatus\_voucher\_JS61.4\_cytochrome\_c\_oxidase\_subunit\_I\_(COI)\_gene\_partial\_cds\_mitochondrial

gij529950057|gb|KC287485.1|\_Calanoides\_carinatus\_voucher\_EPEAJ376\_cytochrome\_c\_oxidase\_subunit\_I\_(COI)\_gene\_partial\_cds\_mitochondrial

gij529950059|gb|KC287486.1|\_Calanoides\_carinatus\_voucher\_EPEAJ377\_cytochrome\_c\_oxidase\_subunit\_I\_(COI)\_gene\_partial\_cds\_mitochondrial

gij529950061|gb|KC287487.1|\_Calanoides\_carinatus\_voucher\_CaLFC1.3\_cytochrome\_c\_oxidase\_subunit\_I\_(COI)\_gene\_partial\_cds\_mitochondrial

gij529950063|gb|KC287488.1|\_Calanoides\_carinatus\_voucher\_CaLFC1.4\_cytochrome\_c\_oxidase\_subunit\_I\_(COI)\_gene\_partial\_cds\_mitochondrial

**Group[ 4 ] n: 38** ;id: gij529949961|gb|KC287437.1|\_Calanoides\_carinatus\_voucher\_CcarBB1\_cytochrome\_c\_oxidase\_subunit\_I\_(COI)\_gene\_partial\_cds\_mitochondrial

gij529949963|gb|KC287438.1|\_Calanoides\_carinatus\_voucher\_CcarBB10\_cytochrome\_c\_oxidase\_subunit\_I\_(COI)\_gene\_partial\_cds\_mitochondrial

gij529949967|gb|KC287440.1|\_Calanoides\_carinatus\_voucher\_CcarBB12\_cytochrome\_c\_oxidase\_subunit\_I\_(COI)\_gene\_partial\_cds\_mitochondrial

gij529949969|gb|KC287441.1|\_Calanoides\_carinatus\_voucher\_CcarBB2\_cytochrome\_c\_oxidase\_subunit\_I\_(COI)\_gene\_partial\_cds\_mitochondrial

gij529949971|gb|KC287442.1|\_Calanoides\_carinatus\_voucher\_CcarBB3\_cytochrome\_c\_oxidase\_subunit\_I\_(COI)\_gene\_partial\_cds\_mitochondrial

gij529949975|gb|KC287444.1|\_Calanoides\_carinatus\_voucher\_CcarBB5\_cytochrome\_c\_oxidase\_subunit\_I\_(COI)\_gene\_partial\_cds\_mitochondrial

gij529949977|gb|KC287445.1|\_Calanoides\_carinatus\_voucher\_CcarBB6\_cytochrome\_c\_oxidase\_subunit\_I\_(COI)\_gene\_partial\_cds\_mitochondrial

gij529949979|gb|KC287446.1|\_Calanoides\_carinatus\_voucher\_CcarBB7\_cytochrome\_c\_oxidase\_subunit\_I\_(COI)\_gene\_partial\_cds\_mitochondrial

gij529949981|gb|KC287447.1|\_Calanoides\_carinatus\_voucher\_CcarBB8\_cytochrome\_c\_oxidase\_subunit\_I\_(COI)\_gene\_partial\_cds\_mitochondrial

gij529949983|gb|KC287448.1|\_Calanoides\_carinatus\_voucher\_CcarBB9\_cytochrome\_c\_oxidase\_subunit\_I\_(COI)\_gene\_partial\_cds\_mitochondrial

gij529949993|gb|KC287453.1|\_Calanoides\_carinatus\_voucher\_CaSAf131\_cytochrome\_c\_oxidase\_subunit\_I\_(COI)\_gene\_partial\_cds\_mitochondrial

gij529949995|gb|KC287454.1|\_Calanoides\_carinatus\_voucher\_CaSAf132\_cytochrome\_c\_oxidase\_subunit\_I\_(COI)\_gene\_partial\_cds\_mitochondrial

gij529949997|gb|KC287455.1|\_Calanoides\_carinatus\_voucher\_CaSAf133\_cytochrome\_c\_oxidase\_subunit\_I\_(COI)\_gene\_partial\_cds\_mitochondrial

gij529949999|gb|KC287456.1|\_Calanoides\_carinatus\_voucher\_CaSAf11\_cytochrome\_c\_oxidase\_subunit\_I\_(COI)\_gene\_partial\_cds\_mitochondrial

gij529950001|gb|KC287457.1|\_Calanoides\_carinatus\_voucher\_CaSAf12\_cytochrome\_c\_oxidase\_subunit\_I\_(COI)\_gene\_partial\_cds\_mitochondrial

gij529950003|gb|KC287458.1|\_Calanoides\_carinatus\_voucher\_CaSAf31\_cytochrome\_c\_oxidase\_subunit\_I\_(COI)\_gene\_partial\_cds\_mitochondrial

gij529950005|gb|KC287459.1|\_Calanoides\_carinatus\_voucher\_CaSAf32\_cytochrome\_c\_oxidase\_subunit\_I\_(COI)\_gene\_partial\_cds\_mitochondrial

gij529950007|gb|KC287460.1|\_Calanoides\_carinatus\_voucher\_CaSAf7\_cytochrome\_c\_oxidase\_subunit\_I\_(COI)\_gene\_partial\_cds\_mitochondrial

gij529950009|gb|KC287461.1|\_Calanoides\_carinatus\_voucher\_CaSAf72\_cytochrome\_c\_oxidase\_subunit\_I\_(COI)\_gene\_partial\_cds\_mitochondrial

gij529950023|gb|KC287468.1|\_Calanoides\_carinatus\_voucher\_CaSpa41\_cytochrome\_c\_oxidase\_subunit\_I\_(COI)\_gene\_partial\_cds\_mitochondrial

gij529950027|gb|KC287470.1|\_Calanoides\_carinatus\_voucher\_CaSpa61\_cytochrome\_c\_oxidase\_subunit\_I\_(COI)\_gene\_partial\_cds\_mitochondrial

gij529950031|gb|KC287472.1|\_Calanoides\_carinatus\_voucher\_CaSpa93\_cytochrome\_c\_oxidase\_subunit\_I\_(COI)\_gene\_partial\_cds\_mitochondrial

gij529950033|gb|KC287473.1|\_Calanoides\_carinatus\_voucher\_CaSpa91\_cytochrome\_c\_oxidase\_subunit\_I\_(COI)\_gene\_partial\_cds\_mitochondrial

gij529950035|gb|KC287474.1|\_Calanoides\_carinatus\_voucher\_CaSpa92\_cytochrome\_c\_oxidase\_subunit\_I\_(COI)\_gene\_partial\_cds\_mitochondrial

gij529950037|gb|KC287475.1|\_Calanoides\_carinatus\_voucher\_Co140.12.1\_cytochrome\_c\_oxidase\_subunit\_I\_(COI)\_gene\_partial\_cds\_mitochondrial

gij529950039|gb|KC287476.1|\_Calanoides\_carinatus\_voucher\_Co140.6.2\_cytochrome\_c\_oxidase\_subunit\_I\_(COI)\_gene\_partial\_cds\_mitochondrial

gij529950041|gb|KC287477.1|\_Calanoides\_carinatus\_voucher\_Co140.6.3\_cytochrome\_c\_oxidase\_subunit\_I\_(COI)\_gene\_partial\_cds\_mitochondrial

gij529950043|gb|KC287478.1|\_Calanoides\_carinatus\_voucher\_Co140.6.4\_cytochrome\_c\_oxidase\_subunit\_I\_(COI)\_gene\_partial\_cds\_mitochondrial

gij529950045|gb|KC287479.1|\_Calanoides\_carinatus\_voucher\_Co140.6.5\_cytochrome\_c\_oxidase\_subunit\_I\_(COI)\_gene\_partial\_cds\_mitochondrial

gij529950047|gb|KC287480.1|\_Calanoides\_carinatus\_voucher\_Co140.6.6\_cytochrome\_c\_oxidase\_subunit\_I\_(COI)\_gene\_partial\_cds\_mitochondrial

gij529950049|gb|KC287481.1|\_Calanoides\_carinatus\_voucher\_Co140.7.1\_cytochrome\_c\_oxidase\_subunit\_I\_(COI)\_gene\_partial\_cds\_mitochondrial

gij529950051|gb|KC287482.1|\_Calanoides\_carinatus\_voucher\_Co140.7.2\_cytochrome\_c\_oxidase\_subunit\_I\_(COI)\_gene\_partial\_cds\_mitochondrial

gij529950053|gb|KC287483.1|\_Calanoides\_carinatus\_voucher\_Co140.7.3\_cytochrome\_c\_oxidase\_subunit\_I\_(COI)\_gene\_partial\_cds\_mitochondrial

gij529950055|gb|KC287484.1|\_Calanoides\_carinatus\_voucher\_Co140.7.4\_cytochrome\_c\_oxidase\_subunit\_I\_(COI)\_gene\_partial\_cds\_mitochondrial

gij529950029|gb|KC287471.1|\_Calanoides\_carinatus\_voucher\_CaSpa62\_cytochrome\_c\_oxidase\_subunit\_I\_(COI)\_gene\_partial\_cds\_mitochondrial

KU314684\_Calanoides\_natalis\_Indian\_Ocean KU314685\_Calanoides\_natalis\_Indian\_Ocean KU314686\_Calanoides\_natalis\_Indian\_Ocean

**Group[ 5 ] n: 3** ;id: gij529949965|gb|KC287439.1|\_Calanoides\_carinatus\_voucher\_CcarBB11\_cytochrome\_c\_oxidase\_subunit\_I\_(COI)\_gene\_partial\_cds\_mitochondrial

gij529949973|gb|KC287443.1|\_Calanoides\_carinatus\_voucher\_CcarBB4\_cytochrome\_c\_oxidase\_subunit\_I\_(COI)\_gene\_partial\_cds\_mitochondrial

gij529950025|gb|KC287469.1|\_Calanoides\_carinatus\_voucher\_CaSpa51\_cytochrome\_c\_oxidase\_subunit\_I\_(COI)\_gene\_partial\_cds\_mitochondrial

**Group[ 6 ] n: 3** ;id: KU314687\_Calanoides\_patagoniensis KU314688\_Calanoides\_patagoniensis KU314689\_Calanoides\_patagoniensis

**Group[ 7 ] n: 1** ;id: gij168479979|dbj|AB379986.1|\_Neocalanus\_flemingeri\_mitochondrial\_COI\_gene\_for\_cytochrome\_oxidase\_subunit\_I\_partial\_cds\_voucher\_DNA: rjml118

**Group[ 8 ] n: 1** ;id:

gij77539299|dbj|AB093144.1|\_Neocalanus\_gracilis\_mitochondrial\_srRNA\_COI\_ND4L\_lrRNA\_genes\_for\_small\_subunit\_ribosomal\_RNA\_cytochrome\_c\_oxidase\_subunit\_I\_NAI

**Group[ 9 ] n: 1** ;id: gij433359029|dbj|AB099239.1|\_Neocalanus\_plumchrus\_mitochondrial\_COI\_gene\_for\_cytochrome\_c\_oxidase\_subunit\_I\_clone: P9801

**Group[ 10 ] n: 1** ;id:

gij77539302|dbj|AB093145.1|\_Neocalanus\_robustior\_mitochondrial\_srRNA\_ND6\_COI\_ND4L\_lrRNA\_genes\_for\_small\_subunit\_ribosomal\_RNA\_NADH\_dehydrogenase\_subunit\_I

**Group[ 11 ] n: 1** ;id:

gij77539306|dbj|AB093146.1|\_Neocalanus\_tonsus\_mitochondrial\_srRNA\_ND6\_COI\_ND4L\_lrRNA\_genes\_for\_small\_subunit\_ribosomal\_RNA\_NADH\_dehydrogenase\_subunit\_I

**Group[ 12 ] n: 1 ;id:**

gij168480003|dbj|AB379998.1|\_Mesocalanus\_tenuicornis\_mitochondrial\_COI\_gene\_for\_cytochrome\_oxidase\_subunit\_I\_partial\_cds\_voucher\_DNA:rjm1135

**Group[ 13 ] n: 1 ;id:** gj|529950393|gb|KC287653.1|\_Mesocalanus\_tenuicornis\_voucher\_Co05.7.1\_cytochrome\_c\_oxidase\_subunit\_I\_(COI)\_gene\_partial\_cds\_mitochondrial

**Group[ 14 ] n: 1 ;id:** gj|529950401|gb|KC287657.1|\_Mesocalanus\_tenuicornis\_voucher\_MeTeL17715\_cytochrome\_c\_oxidase\_subunit\_I\_(COI)\_gene\_partial\_cds\_mitochondrial

**Group[ 15 ] n: 1 ;id:** gj|529950397|gb|KC287655.1|\_Mesocalanus\_tenuicornis\_voucher\_Co5.BB2\_cytochrome\_c\_oxidase\_subunit\_I\_(COI)\_gene\_partial\_cds\_mitochondrial

**Group[ 16 ] n: 1 ;id:** gj|239859652|gb|FJ602507.1|\_Neocalanus\_cristatus\_voucher\_UCONN:Co227.2.3\_cytochrome\_oxidase\_subunit\_I\_(COI)\_gene\_partial\_cds\_mitochondrial
